# Supplementary material for: Synthesis of isoquinolines via Rh-catalyzed C–H activation/C–N cyclization with diazodiesters or diazoketoesters as a C2 source
Source: Royal Society of Chemistry journal article supplement (doi:10.1039/c6ob00901h), 2016-01-01
Supplement: c6ob00901h1.pdf [file c6ob00901h1.pdf]

## Supporting Information for

### Synthesis of Isoquinolines via Rh-Catalyzed C-H Activation/C-N Cyclization with Diazodiester or Diazoketoesters as C<sub>2</sub> Source

Jie Wang, Shanke Zha, Kehao Chen, Feifei Zhang, and Jin Zhu\*

*Department of Polymer Science and Engineering, School of Chemistry and Chemical Engineering, State Key Laboratory of Coordination Chemistry, Nanjing National Laboratory of Microstructures, Nanjing University, Nanjing 210093, China*

\*Corresponding author. Email: jinz@nju.edu.cn; Phone: +86-25-89686291; Fax: +86-25-83317761

#### Table of Contents

|                                                                    |               |
|--------------------------------------------------------------------|---------------|
| <b>General Methods</b> .....                                       | <b>1</b>      |
| <b>Synthesis of Substrates</b> .....                               | <b>1</b>      |
| <b>Screening of Base Quantities</b> .....                          | <b>1-2</b>    |
| <b>Screening of Solvent</b> .....                                  | <b>2</b>      |
| <b>Synthesis and Characterization of Isoquinoline-3-oles</b> ..... | <b>2-6</b>    |
| <b>Synthesis and Characterization of Isoquinolines</b> .....       | <b>7-12</b>   |
| <b>References</b> .....                                            | <b>13</b>     |
| <b>NMR Spectra for All the Compounds</b> .....                     | <b>14-103</b> |

## 1. General Information

### Materials:

All reactions were carried out without any particular precautions to extrude moisture or oxygen. All reactions beyond room temperature (rt) were run in oil baths with the temperatures calibrated with a thermometer. Prior to an experiment, the oil bath was allowed to equilibrate to the desired temperature for 15 min. Dry solvents (<50 ppm H<sub>2</sub>O) were purchased from Sigma-Aldrich or TCI and stored over molecular sieves under argon atmosphere and were transferred under nitrogen. [RhCp\*Cl<sub>2</sub>]<sub>2</sub> and AgSbF<sub>6</sub> were purchased from Meryer or Sigma-Aldrich, stored and weighed in a nitrogen-filled glove box. All other chemicals were obtained from local suppliers or synthesized according to the literature procedures.

### Methods:

Analytical thin layer chromatography (TLC) was performed on silica gel 60 F<sub>254</sub> aluminum plates. TLC plates were visualized by exposure to short wave ultraviolet light (254 nm, 365 nm) and/or iodine. Flash chromatography was performed on Merck silica gel (40-63 mesh) by standard techniques. <sup>1</sup>H and <sup>13</sup>C NMR spectra were recorded on a Bruker AV 300, Bruker AV 400 in solvents as indicated. Chemical shifts (δ) for <sup>1</sup>H and <sup>13</sup>C NMR spectra are given in ppm relative to TMS. The residual solvent signals were used as references for <sup>1</sup>H and <sup>13</sup>C NMR spectra and the chemical shifts converted to the TMS scale. The following notations were used: br – broad, s – singlet, d – doublet, t – triplet, q – quartet, m – multiplet, dd – doublet of doublet, dt – doublet of triplet, td – triplet of doublet, ddd – doublet of doublet. Mass spectroscopy data of the products were collected on an HRMS-TOF instrument using ESI ionization.

## 2. Synthesis of Substrates

The benzimidates<sup>S1, S2</sup> and  $\alpha$ -diazo compounds<sup>S3, S4, S5, S6</sup> were prepared according to the methods given in the cited references without any optimization of the reaction conditions.

## 3. Table 1. Screening of Base Quantities<sup>a,b</sup>

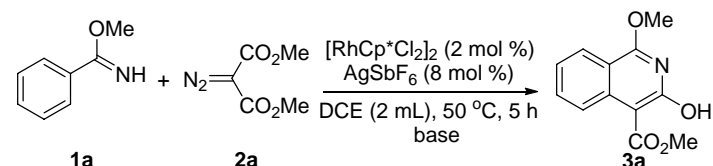

| entry | base (mol %) | yield (%) |
|-------|--------------|-----------|
| 1     | 5            | 45        |
| 2     | 10           | 82        |
| 3     | 20           | 95        |
| 4     | 50           | 94        |
| 5     | 100          | 90        |
| 6     | 150          | 84        |
| 7     | 200          | 70        |

<sup>a</sup>Reaction conditions: **1a** (0.4 mmol), **2** (0.6 mmol). <sup>b</sup>Isolated yields.

#### 4. Table 2. Screening of Solvent<sup>a,b</sup>

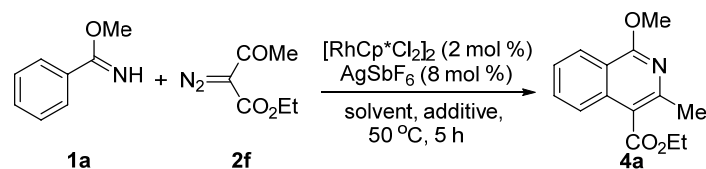

| entry | solvent                            | additive | yield (%) |
|-------|------------------------------------|----------|-----------|
| 1     | DCE                                | KOAc     | 0         |
| 2     | DCE                                | -        | 0         |
| 3     | CH <sub>3</sub> OH                 | -        | 90        |
| 4     | CH <sub>3</sub> CN                 | -        | 72        |
| 5     | CF <sub>3</sub> CH <sub>2</sub> OH | -        | 85        |
| 6     | THF                                | -        | 0         |
| 7     | Toluene                            | -        | 0         |
| 8     | Acetone                            | -        | 54        |
| 9     | CH <sub>3</sub> OH                 | KOAc     | 82        |
| 10    | CH <sub>3</sub> OH                 | HOAc     | 62        |

<sup>a</sup>Reaction conditions: **1a** (0.4 mmol), **2f** (0.6 mmol), solvent (2 mL), additive (10 mol %). <sup>b</sup>Isolated yields.

#### 5. Synthesis and Characterization of Isoquinoline-3-oles

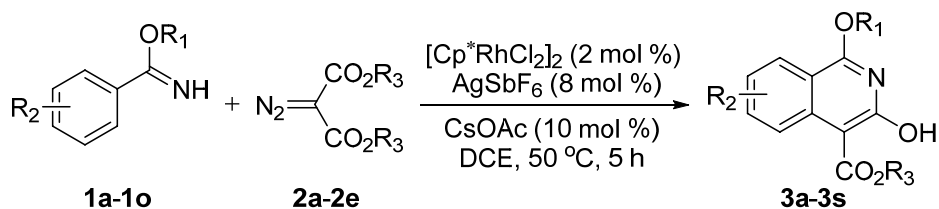

To a 13 × 150 mm test tube equipped with magnetic stir bar were added [RhCp\*Cl<sub>2</sub>]<sub>2</sub> (2 mol %), AgSbF<sub>6</sub> (8 mol %)

and KOAc (20 mol %) in the glovebox. The test tube was sealed with a rubber septum and removed from the glovebox. The solution of benzimidates (e.g. **1a**, 0.4mmol),  $\alpha$ -diazo- $\beta$ -ester compounds (e.g. **2a**, 0.6 mmol) in DCE (2 mL) was injected into the test tube via syringe. The reaction mixture was placed in a pre-heated oil bath (50 °C), stirred for 12 h, during which time a constant checking by TLC was performed. Once the reaction proceeded to a desired degree, the reaction mixture was cooled to rt and filtered over celite. The solvent was then removed under reduce pressure and the residue was purified by flash column chromatography on silica gel with hexanes/EtOAc as the eluent to give the corresponding isoquinoline-3- hydroxy (e.g. **3a**).

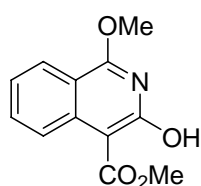

**Methyl 3-hydroxy-1-methoxyisoquinoline-4-carboxylate (3a):** The title compound was obtained as a white solid in 94% yield.  $^1\text{H NMR}$  (400 MHz,  $\text{CDCl}_3$ )  $\delta$  13.31 (s, 1H), 8.63 (d,  $J = 8.7$  Hz, 1H), 8.25 (d,  $J = 7.4$  Hz, 1H), 7.68 (ddd,  $J = 8.6, 7.0, 1.5$  Hz, 1H), 7.36 (t,  $J = 7.1$  Hz, 1H), 4.66 (q,  $J = 7.1$  Hz, 2H), 4.09 (s, 3H), 1.51 (t,  $J = 7.1$  Hz, 3H).  $^{13}\text{C NMR}$  (101MHz,  $\text{CDCl}_3$ )  $\delta$  172.85, 167.34, 165.28, 137.34, 132.62, 125.05, 124.55, 123.91, 116.02, 91.93, 54.84, 52.46. **HRMS (ESI)** Calcd. For  $\text{C}_{12}\text{H}_{12}\text{NO}_4$ :  $[\text{M}+\text{H}]^+$ , 234.0761. Found:  $m/z$ , 234.0760.

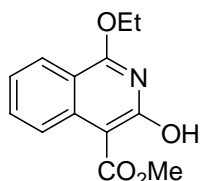

**Methyl 1-ethoxy-3-hydroxyisoquinoline-4-carboxylate (3b):** The title compound was obtained as a white solid in 93% yield.  $^1\text{H NMR}$  (400 MHz,  $\text{CDCl}_3$ )  $\delta$  13.31 (s, 1H), 8.63 (d,  $J = 8.7$  Hz, 1H), 8.25 (dd,  $J = 8.3, 0.9$  Hz, 1H), 7.68 (ddd,  $J = 8.6, 7.0, 1.5$  Hz, 1H), 7.36 (ddd,  $J = 8.1, 7.0, 0.9$  Hz, 1H), 4.66 (q,  $J = 7.1$  Hz, 2H), 4.09 (s, 3H), 1.51 (t,  $J = 7.1$  Hz, 3H).  $^{13}\text{C NMR}$  (101 MHz,  $\text{CDCl}_3$ )  $\delta$  172.85, 167.42, 164.91, 137.29, 132.53, 125.07, 124.48, 123.77, 116.05, 91.67, 63.55, 52.42, 14.36. **HRMS (ESI)** Calcd. for  $\text{C}_{13}\text{H}_{14}\text{NO}_4$ :  $[\text{M}+\text{H}]^+$ , 248.0917. Found:  $m/z$ , 248.0916.

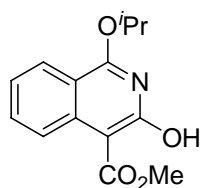

**Methyl 3-hydroxy-1-isopropoxyisoquinoline-4-carboxylate (3c):** The title compound was obtained as a white solid in 94% yield.  $^1\text{H NMR}$  (400 MHz,  $\text{CDCl}_3$ )  $\delta$  13.32 (s, 1H), 8.63 (d,  $J = 8.7$  Hz, 1H), 8.24 (d,  $J = 7.5$  Hz, 1H), 7.67 (t,  $J = 7.2$  Hz, 1H), 7.35 (t,  $J = 7.4$  Hz, 1H), 5.77 – 5.66 (m, 1H), 4.08 (s, 3H), 1.47 (d,  $J = 6.2$  Hz, 6H).  $^{13}\text{C NMR}$  (101 MHz,  $\text{CDCl}_3$ )  $\delta$  166.34, 160.12, 152.02, 138.46, 133.35, 130.45, 128.53 (2C), 128.46 (2C), 127.96, 126.20, 123.66, 115.72, 70.02, 21.98 (3C). **HRMS (ESI)** Calcd. for  $\text{C}_{14}\text{H}_{16}\text{NO}_4$ :  $[\text{M}+\text{H}]^+$ , 262.1074. Found:  $m/z$ , 262.1072.

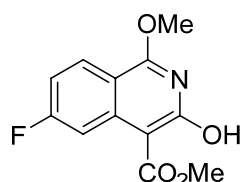

**Methyl 6-fluoro-3-hydroxy-1-methoxyisoquinoline-4-carboxylate (3d):** The title compound was obtained as a white solid in 96% yield.  $^1\text{H NMR}$  (400 MHz,  $\text{CDCl}_3$ )  $\delta$  13.39 (s, 1H), 8.30 (dd,  $J = 12.7, 2.4$  Hz, 1H), 8.23 (dd,  $J = 9.1, 6.3$  Hz, 1H), 7.10 (ddd,  $J = 9.1, 7.8, 2.5$  Hz, 1H), 4.19 (s, 3H), 4.10 (s, 3H).  $^{13}\text{C NMR}$  (101 MHz,  $\text{CDCl}_3$ )  $\delta$  172.42, 168.15, 165.45 (d,  $J = 251.69$ ), 164.91, 139.39 (d,  $J = 12.22$ ), 127.96 (d,  $J = 10.61$ ), 113.21 (d,  $J = 24.75$ ), 112.72, 109.70 (d,  $J = 25.96$ ), 91.85 (d,  $J = 3.64$ ), 54.91, 52.59. **HRMS (ESI)** Calcd. for  $\text{C}_{12}\text{H}_{11}\text{FNO}_4$ :  $[\text{M}+\text{H}]^+$ , 252.0667. Found:  $m/z$ , 252.0665.

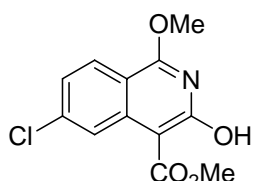

**Methyl 6-chloro-3-hydroxy-1-methoxyisoquinoline-4-carboxylate (3e):** The title compound was obtained as a white solid in 87% yield.  $^1\text{H NMR}$  (400 MHz,  $\text{CDCl}_3$ )  $\delta$  13.41 (s, 1H), 8.62 (d,  $J = 1.8$  Hz, 1H), 8.13 (d,  $J = 8.8$  Hz, 1H), 7.31 (dd,  $J = 8.8, 2.0$  Hz, 1H), 4.19 (s, 3H), 4.11 (s, 3H).  $^{13}\text{C NMR}$  (101 MHz,  $\text{CDCl}_3$ )  $\delta$  172.32, 167.97, 164.99, 139.42, 138.16, 126.52, 124.55, 123.88, 114.11, 91.31, 54.98, 52.69. **HRMS (ESI)** Calcd. for  $\text{C}_{12}\text{H}_{11}\text{ClNO}_4$ :  $[\text{M}+\text{H}]^+$ , 268.0371. Found:  $m/z$ , 268.0370.

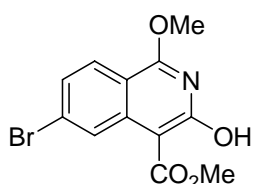

**Methyl 6-bromo-3-hydroxy-1-methoxyisoquinoline-4-carboxylate (3f):** The title compound was obtained as a white solid in 84% yield.  $^1\text{H NMR}$  (300 MHz,  $\text{CDCl}_3$ )  $^1\text{H NMR}$  (400 MHz,  $\text{CDCl}_3$ )  $\delta$  13.39 (s, 1H), 8.81 (d,  $J = 1.8$  Hz, 1H), 8.06 (d,  $J = 8.8$  Hz, 1H), 7.46 (dd,  $J = 8.8, 1.8$  Hz, 1H), 4.19 (s, 3H), 4.11 (s, 3H).  $^{13}\text{C NMR}$  (101 MHz,  $\text{CDCl}_3$ )  $\delta$  172.30, 167.87, 165.13, 138.37, 128.43, 127.27, 127.05, 126.49, 114.40, 91.17, 55.02, 52.74. **HRMS (ESI)** Calcd. for  $\text{C}_{12}\text{H}_{11}\text{BrNO}$ :  $[\text{M}+\text{H}]^+$ , 311.9866. Found:  $m/z$ , 311.9866.

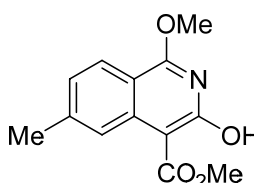

**Methyl 3-hydroxy-1-methoxy-6-methylisoquinoline-4-carboxylate (3g):** The title compound was obtained as a white solid in 92% yield.  $^1\text{H NMR}$  (400 MHz,  $\text{CDCl}_3$ )  $\delta$  13.32 (s, 1H), 8.42 (s, 1H), 8.10 (d,  $J = 8.4$  Hz, 1H), 7.19 (dd,  $J = 8.4, 1.2$  Hz, 1H), 4.18 (s, 3H), 4.09 (s, 3H), 2.53 (s, 3H).  $^{13}\text{C NMR}$  (101 MHz,  $\text{CDCl}_3$ )  $\delta$  172.88, 167.45, 165.10, 143.16, 137.51, 125.70, 124.79, 124.00, 113.97, 91.57, 54.66, 52.34, 22.66. **HRMS (ESI)** Calcd. for  $\text{C}_{13}\text{H}_{14}\text{NO}_4$ :  $[\text{M}+\text{H}]^+$ , 248.0917. Found:  $m/z$ , 248.0916.

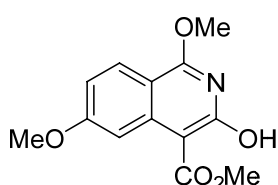

**Methyl 3-hydroxy-1,6-dimethoxyisoquinoline-4-carboxylate (3h):** The title compound was obtained as a white solid in 96% yield.  $^1\text{H NMR}$  (400 MHz,  $\text{CDCl}_3$ )  $\delta$  13.32 (s, 1H), 8.12 (d,  $J = 9.1$  Hz, 1H), 8.05 (d,  $J = 2.4$  Hz, 1H), 6.97 (dd,  $J = 9.1, 2.5$  Hz, 1H), 4.17 (s, 3H), 4.08 (s, 3H), 3.94 (s, 3H).  $^{13}\text{C NMR}$  (101 MHz,  $\text{CDCl}_3$ )  $\delta$  172.82, 168.06, 165.01, 163.07, 139.63, 126.92, 114.39, 110.56, 105.44, 91.68, 55.21, 54.68, 52.45. **HRMS (ESI)** Calcd. for  $\text{C}_{13}\text{H}_{14}\text{NO}_5$ :  $[\text{M}+\text{H}]^+$ , 264.0866. Found:  $m/z$ , 264.0865.

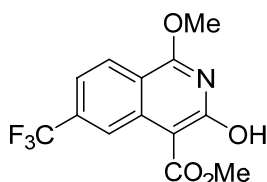

**Methyl 3-hydroxy-1-methoxy-6-(trifluoromethyl)isoquinoline-4-carboxylate (3i):** The title compound was obtained as a white solid in 95% yield.  $^1\text{H NMR}$  (400 MHz,  $\text{CDCl}_3$ )  $\delta$  13.41 (s, 1H), 8.96 (s, 1H), 8.33 (d,  $J = 8.6$  Hz, 1H), 7.55 (dd,  $J = 8.6, 1.5$  Hz, 1H), 4.23 (s, 3H), 4.13 (s, 3H).  $^{13}\text{C NMR}$  (101 MHz,  $\text{CDCl}_3$ )  $\delta$  172.21, 167.97, 164.91, 136.81, 133.84 (q,  $J = 32.12$ ), 126.10, 123.90 (q,  $J = 274.11$ ), 122.00 (q,  $J = 4.55$ ), 119.73 (q,  $J = 3.23$ ), 117.32, 92.10, 55.19, 52.78. **HRMS (ESI)** Calcd. for  $\text{C}_{13}\text{H}_{11}\text{F}_3\text{NO}_4$ :  $[\text{M}+\text{H}]^+$ , 302.0635. Found:  $m/z$ , 302.0635.

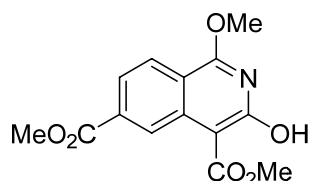

**Dimethyl 3-hydroxy-1-methoxyisoquinoline-4,6-dicarboxylate (3j):** The title compound was obtained as a white solid in 78% yield.  $^1\text{H NMR}$  (400 MHz,  $\text{CDCl}_3$ )  $\delta$  13.38 (s, 1H), 9.36 (d,  $J = 1.0$  Hz, 1H), 8.28 – 8.25 (m, 1H), 7.94 (dd,  $J = 8.6, 1.5$  Hz, 1H), 4.22 (s, 3H), 4.13 (s, 3H), 4.00 (s, 3H).  $^{13}\text{C NMR}$  (101 MHz,  $\text{CDCl}_3$ )  $\delta$  172.43, 167.63, 166.78, 164.95, 136.76, 133.29, 126.82, 125.22, 123.59, 117.99, 92.27, 55.08, 52.75, 52.56. **HRMS (ESI)** Calcd. for  $\text{C}_{14}\text{H}_{14}\text{NO}_6$ :  $[\text{M}+\text{H}]^+$ , 292.0816. Found:  $m/z$ , 292.0815.

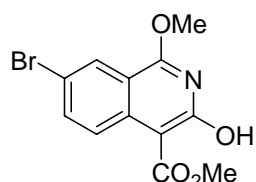

**Methyl 7-bromo-3-hydroxy-1-methoxyisoquinoline-4-carboxylate (3k):** The title compound was obtained as a white solid in 93% yield.  $^1\text{H NMR}$  (300 MHz,  $\text{CDCl}_3$ )  $\delta$  13.31 (s, 1H), 8.51 (d,  $J = 9.3$  Hz, 1H), 8.35 (d,  $J = 2.2$  Hz, 1H), 7.72 (dd,  $J = 9.3, 2.3$  Hz, 1H), 4.20 (s, 3H), 4.09 (s, 3H).  $^{13}\text{C NMR}$  (101 MHz,  $\text{CDCl}_3$ )  $\delta$  172.45, 167.35, 164.25, 135.99, 135.68, 127.41, 126.49, 117.51, 117.29, 91.94, 55.09, 52.68. **HRMS (ESI)** Calcd. for  $\text{C}_{12}\text{H}_{11}\text{BrNO}_4$ :  $[\text{M}+\text{H}]^+$ , 311.9866. Found:  $m/z$ , 311.9864.

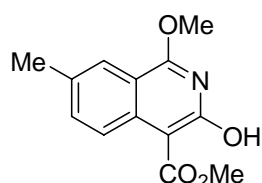

**Methyl 3-hydroxy-1-methoxy-7-methylisoquinoline-4-carboxylate (3l):** The title compound was obtained as a white solid in 90% yield.  $^1\text{H NMR}$  (300 MHz,  $\text{CDCl}_3$ )  $\delta$  13.23 (s, 1H), 8.52 (d,  $J = 8.8$  Hz, 1H), 8.00 (s, 1H), 7.50 (dd,  $J = 8.9, 2.0$  Hz, 1H), 4.19 (s, 3H), 4.08 (s, 3H), 2.46 (s, 3H).  $^{13}\text{C NMR}$  (101 MHz,  $\text{CDCl}_3$ )  $\delta$  172.84, 166.74, 164.85, 135.24, 134.49, 133.60, 124.44, 124.13, 116.10, 91.88, 54.73, 52.38, 21.07. **HRMS (ESI)** Calcd. for  $\text{C}_{13}\text{H}_{14}\text{NO}_4$ :  $[\text{M}+\text{H}]^+$ , 248.1917. Found:  $m/z$ , 248.1916.

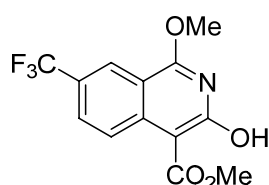

**Methyl 3-hydroxy-1-methoxy-7-(trifluoromethyl)isoquinoline-4-carboxylate (3m):** The title compound was obtained as a white solid in 78% yield.  $^1\text{H NMR}$  (300 MHz,  $\text{CDCl}_3$ )  $\delta$  13.48 (s, 1H), 8.74 (d,  $J = 9.1$  Hz, 1H), 8.50 (s, 1H), 7.83 (dd,  $J = 9.1, 1.7$  Hz, 1H), 4.23 (s, 3H), 4.11 (s, 3H).  $^{13}\text{C NMR}$  (101 MHz,  $\text{CDCl}_3$ )  $\delta$  172.38, 168.54, 165.38, 139.28, 128.17 (q,  $J = 3.1$ ), 125.79 (q,  $J = 33.4$ ), 125.49, 123.93 (q,  $J = 272.8$ ), 122.84 (q,  $J = 4.3$ ), 115.10, 92.02, 55.20, 52.77. **HRMS (ESI)** Calcd. for  $\text{C}_{13}\text{H}_{11}\text{F}_3\text{NO}_4$ :  $[\text{M}+\text{H}]^+$ , 302.0635. Found:  $m/z$ , 302.0633.

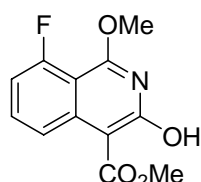

**Methyl 8-fluoro-3-hydroxy-1-methoxyisoquinoline-4-carboxylate (3n):** The title compound was obtained as a white solid in 74% yield.  $^1\text{H NMR}$  (300 MHz,  $\text{CDCl}_3$ )  $\delta$  13.36 (s, 1H), 8.42 (d,  $J = 8.8$  Hz, 1H), 7.57 (td,  $J = 8.3, 5.6$  Hz, 1H), 7.00 (dd,  $J = 11.5, 7.9$  Hz, 1H), 4.19 (s, 3H), 4.07 (s, 3H).  $^{13}\text{C NMR}$  (101 MHz,  $\text{CDCl}_3$ )  $\delta$  172.57, 167.32, 164.47 (d,  $J = 5.6$ ), 160.38 (d,  $J = 262.1$ ), 140.08, 133.03 (d,  $J = 10.0$ ), 120.34 (d,  $J = 4.5$ ), 110.25 (d,  $J = 21.9$ ), 106.42 (d,  $J = 11.4$ ), 91.61 (d,  $J = 2.7$ ), 55.14, 52.71. **HRMS (ESI)** Calcd. for  $\text{C}_{12}\text{H}_{11}\text{FNO}_4$ :  $[\text{M}+\text{H}]^+$ , 252.0667. Found:  $m/z$ , 252.0665.

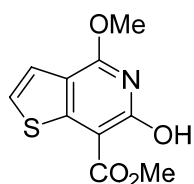

**Methyl 6-hydroxy-4-methoxythieno[3,2-c]pyridine-7-carboxylate (3o):** The title compound was obtained as a white solid in 70% yield.  $^1\text{H NMR}$  (400 MHz,  $\text{CDCl}_3$ )  $\delta$  12.49 (s, 1H), 7.76 (d,  $J = 5.4$  Hz, 1H), 7.69 (d,  $J = 5.4$  Hz, 1H), 4.15 (s, 3H), 4.03 (s, 3H).  $^{13}\text{C NMR}$  (101 MHz,  $\text{CDCl}_3$ )  $\delta$  171.17, 166.56, 161.26, 147.40, 134.03, 125.01, 116.70, 94.40, 54.73, 52.47. **HRMS (ESI)** Calcd. for  $\text{C}_{10}\text{H}_{10}\text{NO}_4\text{S}$ :  $[\text{M}+\text{H}]^+$ , 240.0325. Found:  $m/z$ , 240.0324.

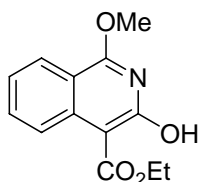

**Ethyl 3-hydroxy-1-methoxyisoquinoline-4-carboxylate (3p):** The title compound was obtained as a white solid in 70% yield.  $^1\text{H NMR}$  (400 MHz,  $\text{CDCl}_3$ )  $\delta$  13.44 (s, 1H), 8.69 (d,  $J = 8.8$  Hz, 1H), 8.21 (dd,  $J = 8.3, 0.9$  Hz, 1H), 7.68 (ddd,  $J = 8.6, 6.9, 1.5$  Hz, 1H), 7.36 (ddd,  $J = 8.1, 7.0, 1.0$  Hz, 1H), 4.56 (q,  $J = 7.1$  Hz, 2H), 4.20 (s, 3H), 1.53 (t,  $J = 7.1$  Hz, 3H).  $^{13}\text{C NMR}$  (101 MHz,  $\text{CDCl}_3$ )  $\delta$  172.46, 167.37, 165.15, 137.44, 132.55, 125.01, 124.47, 123.80, 115.97, 91.92, 61.98, 54.80, 14.36. **HRMS (ESI)** Calcd. for  $\text{C}_{13}\text{H}_{14}\text{NO}_4$ :  $[\text{M}+\text{H}]^+$ , 248.0917. Found:  $m/z$ , 248.0917.

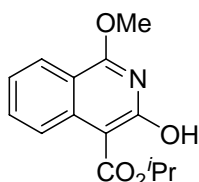

**Isopropyl 3-hydroxy-1-methoxyisoquinoline-4-carboxylate (3q):** The title compound was obtained as a white solid in 70% yield.  $^1\text{H NMR}$  (400 MHz,  $\text{CDCl}_3$ )  $\delta$  13.53 (s, 1H), 8.71 (d,  $J = 8.7$  Hz, 1H), 8.22 (dd,  $J = 8.3, 0.9$  Hz, 1H), 7.68 (ddd,  $J = 8.6, 6.9, 1.5$  Hz, 1H), 7.36 (ddd,  $J = 8.1, 7.0, 1.0$  Hz, 1H), 5.45 (hept,  $J = 6.3$  Hz, 1H), 4.20 (s, 3H), 1.51 (d,  $J = 6.3$  Hz, 6H).  $^{13}\text{C NMR}$  (101 MHz,  $\text{CDCl}_3$ )  $\delta$  172.04, 167.38, 165.11, 137.62, 132.54, 125.04, 124.50, 123.77, 116.03, 92.19, 70.16, 54.80, 22.13. **HRMS (ESI)** Calcd. for  $\text{C}_{14}\text{H}_{16}\text{NO}_4$ :  $[\text{M}+\text{H}]^+$ , 261.1074. Found:  $m/z$ , 262.1072.

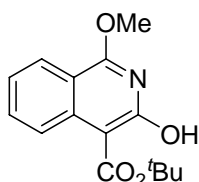

**Tert-butyl 3-hydroxy-1-methoxyisoquinoline-4-carboxylate (3r):** The title compound was obtained as a white solid in 70% yield.  $^1\text{H NMR}$  (400 MHz,  $\text{CDCl}_3$ )  $\delta$  13.63 (s, 1H), 8.70 (d,  $J = 8.8$  Hz, 1H), 8.21 (dd,  $J = 8.3, 1.0$  Hz, 1H), 7.66 (ddd,  $J = 8.6, 6.9, 1.5$  Hz, 1H), 7.34 (ddd,  $J = 8.1, 7.0, 1.0$  Hz, 1H), 4.19 (s, 3H), 1.72 (s, 9H).  $^{13}\text{C NMR}$  (101 MHz,  $\text{CDCl}_3$ )  $\delta$  171.95, 167.30, 164.85, 137.70, 132.36, 125.01, 124.49, 123.63, 116.01, 92.97, 84.08, 54.75, 28.57. **HRMS (ESI)** Calcd. for  $\text{C}_{15}\text{H}_{18}\text{NO}_4$ :  $[\text{M}+\text{H}]^+$ , 276.1230. Found:  $m/z$ , 276.1229.

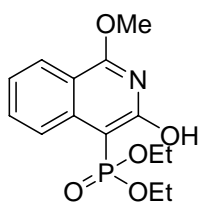

**Diethyl (3-hydroxy-1-methoxyisoquinolin-4-yl)phosphonate (3s):** The title compound was obtained as a white solid in 70% yield.  $^1\text{H NMR}$  (400 MHz,  $\text{CDCl}_3$ )  $\delta$  12.30 (s, 1H), 8.19 (d,  $J = 8.3$  Hz, 1H), 7.92 (d,  $J = 8.5$  Hz, 1H), 7.64 (ddd,  $J = 8.4, 7.0, 1.4$  Hz, 1H), 7.39 – 7.32 (m, 1H), 4.22 – 4.15 (m, 5H), 3.99 (dd,  $J = 17.2, 8.5$  Hz, 2H), 1.29 (t,  $J = 7.1$  Hz, 6H).  $^{13}\text{C NMR}$  (101 MHz,  $\text{CDCl}_3$ )  $\delta$  166.42 (d,  $J = 12.8$ ), 165.50 (d,  $J = 1.7$ ), 139.32 (d,  $J = 8.8$ ), 132.19, 125.04, 123.96, 123.62 (d,  $J = 4.0$ ), 115.84 (d,  $J = 10.1$ ), 84.14 (d,  $J = 187.6$ ), 62.58 (d,  $J = 4.2$ ), 54.70, 16.14 (d,  $J = 6.9$ ). **HRMS (ESI)** Calcd. for  $\text{C}_{16}\text{H}_{19}\text{NO}_5\text{P}$ :  $[\text{M}+\text{H}]^+$ , 312.0923. Found:  $m/z$ , 312.0921.

## 6. Synthesis and Characterization of Isoquinolines

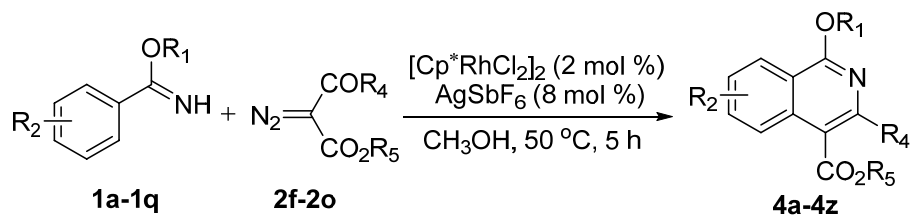

To a 13 × 150 mm test tube equipped with magnetic stir bar were added  $[\text{RhCp}^*\text{Cl}_2]_2$  (2 mol %) and  $\text{AgSbF}_6$  (8 mol %) in the glovebox. The test tube was sealed with a rubber septum and removed from the glovebox. The solution of benzimidates (e.g. **1a**, 0.4mmol),  $\alpha$ -diazo- $\beta$ -keto compounds (e.g. **2f**, 0.6 mmol) in  $\text{CH}_3\text{OH}$  (2 mL) was injected into the test tube via syringe. The reaction mixture was placed in a pre-heated oil bath (50 °C), stirred for 5h, during which time a constant checking by TLC was performed. Once the reaction proceeded to a desired degree, the reaction mixture was cooled to rt and filtered over celite. The solvent was then removed under reduce pressure and the residue was purified by flash column chromatography on silica gel with hexanes/ $\text{EtOAc}$  as the eluent to give the corresponding isoquinoline derivatives (e.g. **4a**).

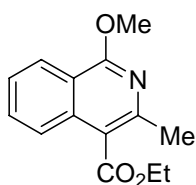

**Ethyl 1-methoxy-3-methylisoquinoline-4-carboxylate (4a):** The title compound was obtained as a white solid in 90% yield.  $^1\text{H NMR}$  (400 MHz,  $\text{CDCl}_3$ )  $\delta$  8.22 (d,  $J = 8.2$  Hz, 1H), 7.88 (d,  $J = 8.5$  Hz, 1H), 7.66 (ddd,  $J = 8.4, 7.0, 1.3$  Hz, 1H), 7.52 – 7.45 (m, 1H), 4.50 (q,  $J = 7.1$  Hz, 2H), 4.14 (s, 3H), 2.62 (s, 3H), 1.45 (t,  $J = 7.1$  Hz, 3H).  $^{13}\text{C NMR}$  (101 MHz,  $\text{CDCl}_3$ )  $\delta$  168.88, 160.54, 148.83, 135.74, 131.08, 125.94, 124.11, 123.63, 117.45, 117.25, 61.14, 53.76, 23.27, 14.33. **HRMS (ESI)** Calcd. For  $\text{C}_{14}\text{H}_{16}\text{NO}_3$ :  $[\text{M}+\text{H}]^+$ , 246.1125. Found:  $m/z$ , 246.1123.

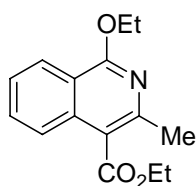

**Ethyl 1-ethoxy-3-methylisoquinoline-4-carboxylate (4b)** <sup>S7</sup>: The title compound was obtained as a white solid in 87% yield.  $^1\text{H NMR}$  (400 MHz,  $\text{CDCl}_3$ )  $\delta$  8.24 (d,  $J = 8.3$  Hz, 1H), 7.88 (d,  $J = 8.5$  Hz, 1H), 7.65 (ddd,  $J = 8.4, 7.0, 1.3$  Hz, 1H), 7.50 – 7.44 (m, 1H), 4.59 (q,  $J = 7.1$  Hz, 2H), 4.49 (q,  $J = 7.1$  Hz, 2H), 2.60 (s, 3H), 1.49 (t,  $J = 7.1$  Hz, 3H), 1.45 (t,  $J = 7.1$  Hz, 3H).  $^{13}\text{C NMR}$  (101 MHz,  $\text{CDCl}_3$ )  $\delta$  169.05, 160.34, 148.92, 135.77, 131.07, 125.87, 124.24, 123.60, 117.57, 116.99, 62.25, 61.18, 23.32, 14.52, 14.37.

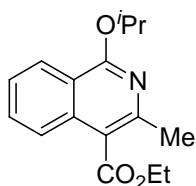

**Ethyl 1-isopropoxy-3-methylisoquinoline-4-carboxylate (4c):** The title compound was obtained as a white solid in 83% yield.  $^1\text{H NMR}$  (400 MHz,  $\text{CDCl}_3$ )  $\delta$  8.23 (d,  $J = 8.2$  Hz, 1H), 7.87 (d,  $J = 8.5$  Hz, 1H), 7.68 – 7.60 (m, 1H), 7.46 (dd,  $J = 11.2, 3.9$  Hz, 1H), 5.70 – 5.58 (m, 1H), 4.49 (q,  $J = 7.1$  Hz, 2H), 2.60 (s, 3H), 1.45 (t,  $J = 6.6$  Hz, 9H).  $^{13}\text{C NMR}$  (101 MHz,  $\text{CDCl}_3$ )  $\delta$  169.10, 159.93, 149.00, 135.86, 131.03, 125.76, 124.36, 123.57, 117.90, 116.62, 68.83, 61.15, 23.40, 21.99, 14.37.

**HRMS (ESI)** Calcd. for  $\text{C}_{16}\text{H}_{20}\text{NO}_3$ :  $[\text{M}+\text{H}]^+$ , 274.1438. Found:  $m/z$ , 274.1436



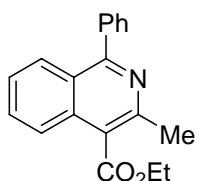

**Ethyl 3-methyl-1-phenylisoquinoline-4-carboxylate (4d)**<sup>S7</sup>: The title compound was obtained as a white solid in 70% yield. <sup>1</sup>H NMR (400 MHz, CDCl<sub>3</sub>) δ 8.04 (d, *J* = 8.4 Hz, 1H), 7.92 (d, *J* = 8.5 Hz, 1H), 7.72 – 7.63 (m, 3H), 7.55 – 7.46 (m, 4H), 4.57 (q, *J* = 7.1 Hz, 2H), 2.79 (s, 3H), 1.49 (t, *J* = 7.1 Hz, 3H). <sup>13</sup>C NMR (101 MHz, CDCl<sub>3</sub>) δ 168.83, 161.71, 148.36, 139.04, 134.25, 131.03, 129.92, 128.91, 128.45, 127.94, 126.64, 124.63, 123.92, 122.61, 61.73, 23.09, 14.37.

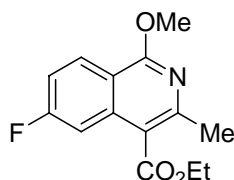

**Ethyl 6-fluoro-1-methoxy-3-methylisoquinoline-4-carboxylate (4e)**: The title compound was obtained as a white solid in 85% yield. <sup>1</sup>H NMR (400 MHz, CDCl<sub>3</sub>) δ 8.23 (dd, *J* = 9.1, 5.9 Hz, 1H), 8.23 (dd, *J* = 9.1, 5.9 Hz, 1H), 7.59 (dd, *J* = 10.9, 2.4 Hz, 1H), 7.59 (dd, *J* = 10.9, 2.4 Hz, 1H), 4.49 (q, *J* = 7.1 Hz, 2H), 4.13 (s, 3H), 2.63 (s, 3H), 1.45 (t, *J* = 7.1 Hz, 3H). <sup>13</sup>C NMR (101 MHz, CDCl<sub>3</sub>) δ 168.43, 164.25 (d, *J* = 251.8 Hz), 160.46, 151.09, 137.81 (d, *J* = 10.8 Hz), 127.24 (d, *J* = 10.0 Hz), 116.70 (d, *J* = 4.5 Hz), 115.73 (d, *J* = 24.9 Hz), 114.44, 108.33 (d, *J* = 23.4 Hz), 61.31, 53.95, 23.58, 14.32. HRMS (ESI) Calcd. for C<sub>14</sub>H<sub>15</sub>FNO<sub>3</sub>: [M+H]<sup>+</sup>, 264.1030. Found: *m/z*, 264.1029.

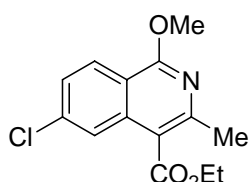

**Ethyl 6-chloro-1-methoxy-3-methylisoquinoline-4-carboxylate (4f)**: The title compound was obtained as a white solid in 82% yield. <sup>1</sup>H NMR (400 MHz, CDCl<sub>3</sub>) δ 8.15 (d, *J* = 8.8 Hz, 1H), 7.93 (d, *J* = 1.9 Hz, 1H), 7.42 (dt, *J* = 8.6, 2.8 Hz, 1H), 4.50 (q, *J* = 7.1 Hz, 2H), 4.13 (s, 3H), 2.63 (s, 3H), 1.46 (t, *J* = 7.1 Hz, 3H). <sup>13</sup>C NMR (101 MHz, CDCl<sub>3</sub>) δ 168.31, 160.47, 150.87, 137.71, 136.78, 126.80, 125.88, 123.06, 116.24, 115.69, 61.36, 53.96, 23.55, 14.34. HRMS (ESI) Calcd. for C<sub>14</sub>H<sub>15</sub>ClNO<sub>3</sub>: [M+H]<sup>+</sup>, 280.0735. Found: *m/z*, 280.0733.

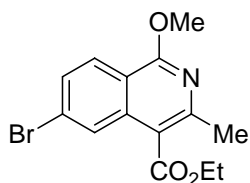

**Ethyl 6-bromo-1-methoxy-3-methylisoquinoline-4-carboxylate (4g)**: The title compound was obtained as a white solid in 86% yield. <sup>1</sup>H NMR (400 MHz, CDCl<sub>3</sub>) δ 8.15 (d, *J* = 8.8 Hz, 1H), 7.93 (d, *J* = 1.9 Hz, 1H), 7.42 (dt, *J* = 8.6, 2.8 Hz, 1H), 4.50 (q, *J* = 7.1 Hz, 2H), 4.13 (s, 3H), 2.63 (s, 3H), 1.46 (t, *J* = 7.1 Hz, 3H). <sup>13</sup>C NMR (101 MHz, CDCl<sub>3</sub>) δ 168.31, 160.47, 150.87, 137.71, 136.78, 126.80, 125.88, 123.06, 116.24, 115.69, 61.36, 53.96, 23.55, 14.34. HRMS (ESI) Calcd. for C<sub>14</sub>H<sub>15</sub>BrNO<sub>3</sub>: [M+H]<sup>+</sup>, 324.0230. Found: *m/z*, 324.0228.

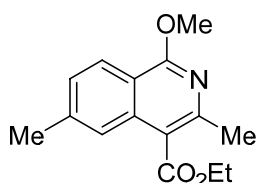

**Ethyl 1-methoxy-3,6-dimethylisoquinoline-4-carboxylate (4h)**: The title compound was obtained as a white solid in 87% yield. <sup>1</sup>H NMR (400 MHz, CDCl<sub>3</sub>) δ 8.10 (d, *J* = 8.4 Hz, 1H), 7.63 (s, 1H), 7.31 (dd, *J* = 8.4, 1.3 Hz, 1H), 4.50 (q, *J* = 7.1 Hz, 2H), 4.13 (s, 3H), 2.60 (s, 3H), 2.50 (s, 3H), 1.45 (t, *J* = 7.1 Hz, 3H). <sup>13</sup>C NMR (101 MHz, CDCl<sub>3</sub>) δ 169.17, 160.57, 148.67, 141.53, 136.01, 128.03, 124.00, 122.83, 116.98, 115.64, 61.15, 53.73, 23.23, 22.24, 14.36. HRMS (ESI) Calcd. for C<sub>15</sub>H<sub>18</sub>NO<sub>3</sub>: [M+H]<sup>+</sup>, 260.1281. Found: *m/z*, 260.1279.

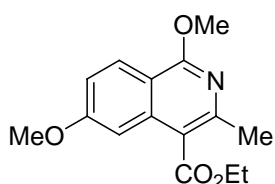

**Ethyl 1,6-dimethoxy-3-methylisoquinoline-4-carboxylate (4i):** The title compound was obtained as a white solid in 82% yield.  $^1\text{H NMR}$  (400 MHz,  $\text{CDCl}_3$ )  $\delta$  8.11 (d,  $J = 9.1$  Hz, 1H), 7.26 (d,  $J = 1.8$  Hz, 1H), 7.08 (dd,  $J = 9.1, 2.4$  Hz, 1H), 4.49 (q,  $J = 7.1$  Hz, 2H), 4.11 (s, 3H), 3.90 (s, 3H), 2.61 (s, 3H), 1.45 (t,  $J = 7.1$  Hz, 3H).  $^{13}\text{C NMR}$  (101 MHz,  $\text{CDCl}_3$ )  $\delta$  169.09, 161.72, 160.52, 150.23, 137.95, 125.93, 117.67, 116.49, 112.34, 102.87, 61.02, 55.26, 53.68, 23.59, 14.37. **HRMS (ESI)** Calcd. for  $\text{C}_{15}\text{H}_{18}\text{NO}_4$ :  $[\text{M}+\text{H}]^+$ , 276.1230. Found:  $m/z$ , 276.1228.

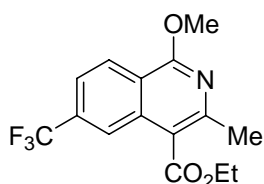

**Ethyl 1-methoxy-3-methyl-6-(trifluoromethyl)isoquinoline-4-carboxylate (4j):** The title compound was obtained as a white solid in 72% yield.  $^1\text{H NMR}$  (400 MHz,  $\text{CDCl}_3$ )  $\delta$  8.33 (d,  $J = 8.6$  Hz, 1H), 8.26 (s, 1H), 7.66 (dd,  $J = 8.6, 1.4$  Hz, 1H), 4.52 (q,  $J = 7.1$  Hz, 2H), 4.16 (s, 3H), 2.67 (s, 3H), 1.47 (t,  $J = 7.1$  Hz, 3H).  $^{13}\text{C NMR}$  (101 MHz,  $\text{CDCl}_3$ )  $\delta$  168.09, 160.36, 151.29, 135.26, 133.65 (q,  $J = 32.4$  Hz), 125.43, 123.87 (q,  $J = 274.0$  Hz), 121.75 (q,  $J = 3.1$  Hz), 121.57 (q,  $J = 4.5$  Hz), 118.73, 117.17, 61.48, 54.12, 23.53, 14.25. **HRMS (ESI)** Calcd. for  $\text{C}_{15}\text{H}_{15}\text{F}_3\text{NO}_3$ :  $[\text{M}+\text{H}]^+$ , 314.0999. Found:  $m/z$ , 314.0998.

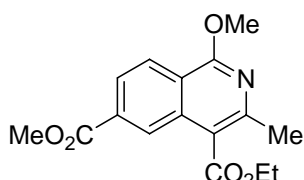

**4-Ethyl 6-methyl 1-methoxy-3-methylisoquinoline-4,6-dicarboxylate (4k):** The title compound was obtained as a white solid in 72% yield.  $^1\text{H NMR}$  (400 MHz,  $\text{CDCl}_3$ )  $\delta$  8.66 – 8.63 (m, 1H), 8.28 (d,  $J = 8.6$  Hz, 1H), 8.08 (dd,  $J = 8.6, 1.3$  Hz, 1H), 4.54 (q,  $J = 7.1$  Hz, 2H), 4.17 (s, 3H), 3.98 (s, 3H), 2.66 (s, 3H), 1.48 (t,  $J = 7.1$  Hz, 3H).  $^{13}\text{C NMR}$  (101 MHz,  $\text{CDCl}_3$ )  $\delta$  168.38, 166.60, 160.43, 150.19, 135.26, 132.17, 126.30, 125.67, 124.54, 119.41, 117.62, 61.47, 54.09, 52.52, 23.34, 14.35. **HRMS (ESI)** Calcd. for  $\text{C}_{16}\text{H}_{18}\text{NO}_5$ :  $[\text{M}+\text{H}]^+$ , 304.1179. Found:  $m/z$ , 304.1178.

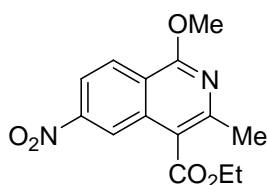

**Ethyl 1-methoxy-3-methyl-6-nitroisoquinoline-4-carboxylate (4l):** The title compound was obtained as a white solid in 69% yield.  $^1\text{H NMR}$  (400 MHz,  $\text{CDCl}_3$ )  $\delta$  8.92 (d,  $J = 2.1$  Hz, 1H), 8.37 (d,  $J = 9.0$  Hz, 1H), 8.22 (dd,  $J = 9.0, 2.2$  Hz, 1H), 4.55 (q,  $J = 7.1$  Hz, 2H), 4.17 (s, 3H), 2.69 (s, 3H), 1.49 (t,  $J = 7.1$  Hz, 3H).  $^{13}\text{C NMR}$  (101 MHz,  $\text{CDCl}_3$ )  $\delta$  167.52, 160.25, 152.63, 149.11, 135.57, 126.21, 120.27, 119.61, 119.33, 117.41, 61.73, 54.38, 23.69, 14.33. **HRMS (ESI)** Calcd. for  $\text{C}_{14}\text{H}_{15}\text{N}_2\text{O}_5$ :  $[\text{M}+\text{H}]^+$ , 291.0975. Found:  $m/z$ , 291.0975.

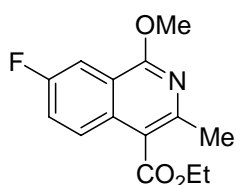

**Ethyl 7-fluoro-1-methoxy-3-methylisoquinoline-4-carboxylate (4m):** The title compound was obtained as a white solid in 81% yield.  $^1\text{H NMR}$  (400 MHz,  $\text{CDCl}_3$ )  $\delta$  8.02 (dd,  $J = 8.2, 1.0$  Hz, 1H), 7.41 (td,  $J = 8.0, 5.1$  Hz, 1H), 7.32 (ddd,  $J = 11.6, 7.8, 1.1$  Hz, 1H), 4.46 (q,  $J = 7.2$  Hz, 2H), 4.12 (s, 3H), 2.54 (s, 3H), 1.41 (t,  $J = 7.1$  Hz, 3H).  $^{13}\text{C NMR}$  (101 MHz,  $\text{CDCl}_3$ )  $\delta$  169.71, 159.85 (d,  $J = 4.0$  Hz), 156.60 (d,  $J = 252.5$  Hz), 147.33, 126.14 (d,  $J = 8.1$  Hz), 125.38 (d,  $J = 14.9$  Hz), 120.28 (d,  $J = 4.2$  Hz), 119.11 (d,  $J = 4.9$  Hz), 115.75 (d,  $J = 20.7$  Hz), 113.87, 61.69, 54.01, 21.98, 14.08. **HRMS (ESI)** Calcd. for  $\text{C}_{14}\text{H}_{15}\text{FNO}_3$ :  $[\text{M}+\text{H}]^+$ , 264.1030. Found:  $m/z$ , 264.1028.

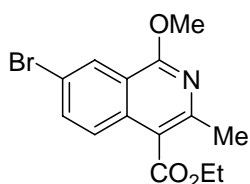

**Ethyl 7-bromo-1-methoxy-3-methylisoquinoline-4-carboxylate (4n):** The title compound was obtained as a white solid in 83% yield.  $^1\text{H NMR}$  (400 MHz,  $\text{CDCl}_3$ )  $\delta$  8.37 (d,  $J = 2.0$  Hz, 1H), 7.80 (d,  $J = 9.0$  Hz, 1H), 7.72 (dd,  $J = 9.0, 2.1$  Hz, 1H), 4.49 (q,  $J = 7.1$  Hz, 2H), 4.14 (s, 3H), 2.61 (s, 3H), 1.44 (t,  $J = 7.1$  Hz, 3H).  $^{13}\text{C NMR}$  (101 MHz,  $\text{CDCl}_3$ )  $\delta$  168.48, 159.59, 149.76, 134.44, 134.39, 126.67, 125.65, 119.72, 118.63, 116.91, 61.39, 54.05, 23.44, 14.34. **HRMS (ESI)** Calcd. for  $\text{C}_{14}\text{H}_{15}\text{BrNO}_3$ :  $[\text{M}+\text{H}]^+$ , 324.0230. Found:  $m/z$ , 324.0228.

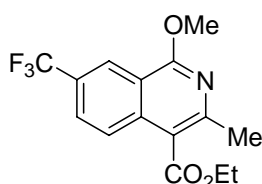

**Ethyl 1-methoxy-3-methyl-7-(trifluoromethyl)isoquinoline-4-carboxylate (4o):** The title compound was obtained as a white solid in 78% yield.  $^1\text{H NMR}$  (400 MHz,  $\text{CDCl}_3$ )  $\delta$  8.53 (s, 1H), 8.03 (d,  $J = 8.9$  Hz, 1H), 7.82 (dd,  $J = 8.9, 1.7$  Hz, 1H), 4.51 (q,  $J = 7.1$  Hz, 2H), 4.16 (s, 3H), 2.65 (s, 3H), 1.46 (t,  $J = 7.1$  Hz, 3H).  $^{13}\text{C NMR}$  (101 MHz,  $\text{CDCl}_3$ )  $\delta$  168.25, 160.82, 151.92, 137.44, 127.81 (q,  $J = 33.0$  Hz), 126.80 (q,  $J = 3.1$  Hz), 124.93, 123.94 (q,  $J = 273.1$  Hz), 122.20 (q,  $J = 4.4$  Hz), 116.97, 116.58, 61.45, 54.13, 23.55, 14.29. **HRMS (ESI)** Calcd. for  $\text{C}_{15}\text{H}_{15}\text{F}_3\text{NO}_3$ :  $[\text{M}+\text{H}]^+$ , 314.0999. Found:  $m/z$ , 314.0996.

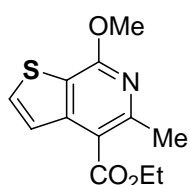

**Ethyl 7-methoxy-5-methylthieno[2,3-c]pyridine-4-carboxylate (4p):** The title compound was obtained as a white solid in 83% yield.  $^1\text{H NMR}$  (400 MHz,  $\text{CDCl}_3$ )  $\delta$  7.76 (d,  $J = 5.4$  Hz, 1H), 7.66 (d,  $J = 5.4$  Hz, 1H), 4.45 (q,  $J = 7.1$  Hz, 2H), 4.15 (s, 3H), 2.78 (s, 3H), 1.45 (t,  $J = 7.1$  Hz, 3H).  $^{13}\text{C NMR}$  (101 MHz,  $\text{CDCl}_3$ )  $\delta$  167.55, 158.50, 154.00, 147.25, 131.94, 124.66, 120.90, 115.03, 60.90, 53.85, 24.20, 14.42. **HRMS (ESI)** Calcd. for  $\text{C}_{12}\text{H}_{14}\text{NO}_3\text{S}$ :  $[\text{M}+\text{H}]^+$ , 252.0689. Found:  $m/z$ , 252.0687.

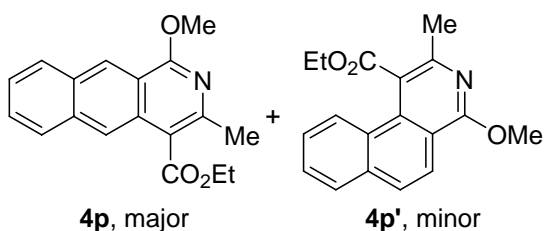

**Ethyl 1-methoxy-3-methylbenzo[g]isoquinoline-4-carboxylate (4q) and ethyl 4-methoxy-2-methylbenzo[f]isoquinoline-1-carboxylate (4q')**: The title compound was obtained as a yellow solid in 85% yield ( $4\text{q}:4\text{q}' = 75\%:7.5\%$ ).  $^1\text{H}$  and  $^{13}\text{C}$  NMR characterization of **4q** (major):  $^1\text{H NMR}$  (400 MHz,  $\text{CDCl}_3$ )  $\delta$  8.85 (s, 1H), 8.41 (s, 1H), 8.02 (d,  $J = 8.3$  Hz, 1H, major), 7.97 (d,  $J = 8.3$  Hz, 1H), 7.56 (t,  $J = 6.9$  Hz, 1H), 7.49 (t,  $J = 6.9$  Hz, 1H), 4.57 (q,  $J = 7.1$  Hz, 2H), 4.23 (s, 3H), 2.66 (s, 3H), 1.50 (t,  $J = 7.1$  Hz, 3H).  $^{13}\text{C NMR}$  (101 MHz,  $\text{CDCl}_3$ )  $\delta$  169.23, 161.14, 147.51, 134.68, 131.75, 131.25, 128.96, 128.28, 127.58, 125.81, 124.53, 122.14, 116.86, 116.45, 61.26, 54.01, 23.44, 14.45.  $^1\text{H}$  and  $^{13}\text{C}$  NMR characterization of **4q'** (minor):  $^1\text{H NMR}$  (400 MHz,  $\text{CDCl}_3$ ) 8.31 (d,  $J = 8.1$  Hz, 0.1H), 8.16 (d,  $J = 8.9$  Hz, 0.1H), 7.91 (d,  $J = 7.9$  Hz, 0.1H), 7.78 (d,  $J = 8.9$  Hz, 0.1H), 7.65 (t,  $J = 6.9$  Hz, 0.1H), 7.56 (t,  $J = 6.9$  Hz, 0.1H), 4.52 (q,  $J = 7.2$  Hz, 0.2H), 4.16 (s, 0.3H), 2.65 (s, 0.3H), 1.40 (t,  $J = 7.2$  Hz, 0.3H).  $^{13}\text{C NMR}$  (101 MHz,  $\text{CDCl}_3$ )  $\delta$  172.18, 160.51, 149.03, 134.80, 133.92, 128.99, 128.28, 128.05, 127.62, 127.48, 126.30, 125.57, 120.89, 117.96, 115.30, 61.85, 22.68, 14.02. **HRMS (ESI)** Calcd. for  $\text{C}_{18}\text{H}_{18}\text{NO}_3$ :  $[\text{M}+\text{H}]^+$ , 296.1281. Found:  $m/z$ , 296.1280.

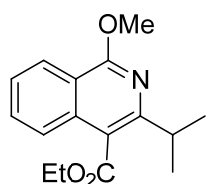

**Ethyl 3-isopropyl-1-methoxyisoquinoline-4-carboxylate (4r):** The title compound was obtained as a white solid in 79% yield.  $^1\text{H NMR}$  (400 MHz,  $\text{CDCl}_3$ )  $\delta$  8.22 (d,  $J = 8.2$  Hz, 1H), 7.79 (d,  $J = 8.4$  Hz, 1H), 7.65 (ddd,  $J = 8.4, 7.0, 1.3$  Hz, 1H), 7.51 – 7.46 (m, 1H), 4.50 (q,  $J = 7.1$  Hz, 2H), 4.15 (s, 3H), 3.23 (hept,  $J = 6.6$  Hz, 1H), 1.45 (t,  $J = 7.1$  Hz, 3H), 1.35 (d,  $J = 6.7$  Hz, 6H).  $^{13}\text{C NMR}$  (101 MHz,  $\text{CDCl}_3$ )  $\delta$  169.33, 160.88, 156.01, 135.54, 130.99, 126.06, 124.11, 123.67, 117.63, 116.33, 61.31, 53.64, 33.55, 22.27, 14.35. **HRMS (ESI)** Calcd. For  $\text{C}_{16}\text{H}_{20}\text{NO}_3$ :  $[\text{M}+\text{H}]^+$ , 274.1438. Found:  $m/z$ , 274.1436.

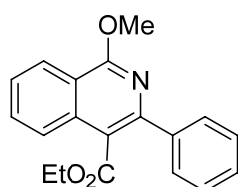

**Ethyl 1-methoxy-3-phenylisoquinoline-4-carboxylate (4s):** The title compound was obtained as a white solid in 85% yield.  $^1\text{H NMR}$  (400 MHz,  $\text{CDCl}_3$ )  $\delta$  8.31 (dd,  $J = 8.3, 0.5$  Hz, 1H), 8.03 (d,  $J = 8.4$  Hz, 1H), 7.74 (ddd,  $J = 8.7, 6.8, 1.5$  Hz, 3H), 7.57 (ddd,  $J = 8.1, 7.0, 1.0$  Hz, 1H), 7.49 – 7.40 (m, 3H), 4.21 (s, 3H), 4.21 (q,  $J = 7.2$  Hz, 2H), 1.03 (t,  $J = 7.2$  Hz, 3H).  $^{13}\text{C NMR}$  (101 MHz,  $\text{CDCl}_3$ )  $\delta$  169.32, 160.75, 149.36, 140.55, 135.84, 131.51, 128.81, 128.49, 128.23, 126.91, 124.29, 124.04, 117.97, 117.71, 61.46, 54.07, 13.71. **HRMS (ESI)** Calcd. For  $\text{C}_{19}\text{H}_{18}\text{NO}_3$ :  $[\text{M}+\text{H}]^+$ , 308.1281. Found:  $m/z$ , 308.1279.

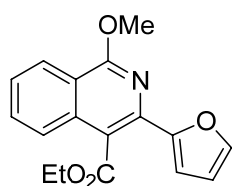

**Ethyl 3-(furan-2-yl)-1-methoxyisoquinoline-4-carboxylate (4t):** The title compound was obtained as a white solid in 81% yield.  $^1\text{H NMR}$  (400 MHz,  $\text{CDCl}_3$ )  $\delta$  8.25 – 8.22 (m, 1H), 7.79 (d,  $J = 8.4$  Hz, 1H), 7.69 (ddd,  $J = 8.3, 7.0, 1.3$  Hz, 1H), 7.52 (ddt,  $J = 4.0, 3.1, 1.7$  Hz, 2H), 7.15 (dd,  $J = 3.3, 0.6$  Hz, 1H), 6.54 (dd,  $J = 3.4, 1.8$  Hz, 1H), 4.52 (q,  $J = 7.2$  Hz, 2H), 4.19 (s, 3H), 1.39 (t,  $J = 7.2$  Hz, 3H).  $^{13}\text{C NMR}$  (101 MHz,  $\text{CDCl}_3$ )  $\delta$  168.95, 160.45, 153.43, 143.54, 137.07, 135.60, 131.53, 126.84, 124.32, 123.84, 118.30, 114.96, 111.87, 110.97, 61.66, 53.90, 14.33. **HRMS (ESI)** Calcd. For  $\text{C}_{17}\text{H}_{16}\text{NO}_4$ :  $[\text{M}+\text{H}]^+$ , 298.1074. Found:  $m/z$ , 289.1073.

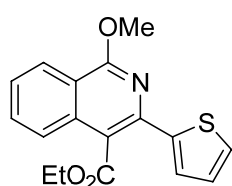

**Ethyl 1-methoxy-3-(thiophen-2-yl)isoquinoline-4-carboxylate (4u):** The title compound was obtained as a white solid in 88% yield.  $^1\text{H NMR}$  (400 MHz,  $\text{CDCl}_3$ )  $\delta$  8.25 (d,  $J = 8.3$  Hz, 1H), 7.77 (d,  $J = 8.4$  Hz, 1H), 7.73 – 7.68 (m, 1H), 7.56 – 7.51 (m, 1H), 7.43 (dd,  $J = 8.3, 4.4$  Hz, 2H), 7.10 (dd,  $J = 5.0, 3.8$  Hz, 1H), 4.46 (q,  $J = 7.2$  Hz, 2H), 4.21 (s, 3H), 1.33 (t,  $J = 7.2$  Hz, 3H).  $^{13}\text{C NMR}$  (101 MHz,  $\text{CDCl}_3$ )  $\delta$  169.40, 160.16, 143.88, 140.74, 135.78, 131.62, 128.00, 127.85, 126.83, 126.10, 124.38, 123.81, 118.01, 115.72, 61.98, 54.16, 14.02. **HRMS (ESI)** Calcd. For  $\text{C}_{17}\text{H}_{16}\text{NO}_3\text{S}$ :  $[\text{M}+\text{H}]^+$ , 314.0845. Found:  $m/z$ , 314.0844.

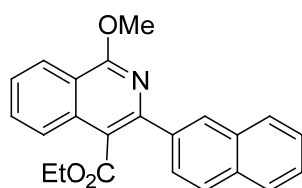

**Ethyl 1-methoxy-3-(naphthalen-2-yl)isoquinoline-4-carboxylate (4v):** The title compound was obtained as a white solid in 74% yield.  $^1\text{H NMR}$  (400 MHz,  $\text{CDCl}_3$ )  $\delta$  8.33 (d,  $J = 8.3$  Hz, 1H), 8.20 (s, 1H), 8.06 (d,  $J = 8.4$  Hz, 1H), 7.95 – 7.88 (m, 4H), 7.76 (ddd,  $J = 8.4, 7.0, 1.3$  Hz, 1H), 7.60 (ddd,  $J = 8.1, 7.0, 1.0$  Hz, 1H), 7.55 – 7.50 (m, 2H),

4.25 (s, 3H), 4.19 (q,  $J = 7.1$  Hz, 2H), 0.93 (t,  $J = 7.1$  Hz, 3H).  $^{13}\text{C}$  NMR (101 MHz,  $\text{CDCl}_3$ )  $\delta$  169.44, 160.82, 149.21, 137.97, 135.95, 133.33, 133.25, 131.61, 128.54, 128.21, 127.93, 127.75, 127.04, 126.76, 126.55, 126.35, 124.38, 124.12, 118.14, 118.05, 61.54, 54.16, 13.80. HRMS (ESI) Calcd. For  $\text{C}_{23}\text{H}_{20}\text{NO}_3$ :  $[\text{M}+\text{H}]^+$ , 358.1438. Found:  $m/z$ , 358.1436.

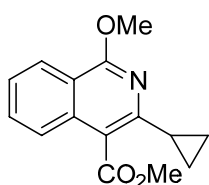

**Methyl 3-cyclopropyl-1-methoxyisoquinoline-4-carboxylate (4w):** The title compound was obtained as a white solid in 83% yield.  $^1\text{H}$  NMR (400 MHz,  $\text{CDCl}_3$ )  $\delta$  8.16 (dd,  $J = 8.3, 0.5$  Hz, 1H), 7.81 (d,  $J = 8.5$  Hz, 1H), 7.63 (ddd,  $J = 8.4, 7.0, 1.3$  Hz, 1H), 7.43 (ddd,  $J = 8.1, 7.0, 1.0$  Hz, 1H), 4.04 (s, 6H), 2.33 – 2.24 (m, 1H), 1.27 – 1.22 (m, 2H), 1.00 – 0.94 (m, 2H).  $^{13}\text{C}$  NMR (101 MHz,  $\text{CDCl}_3$ )  $\delta$  169.70, 161.08, 152.76, 135.78, 131.18, 125.65, 124.09, 123.39, 117.25, 116.24, 53.53, 52.28, 14.85, 9.53. HRMS (ESI) Calcd. For  $\text{C}_{15}\text{H}_{16}\text{NO}_3$ :  $[\text{M}+\text{H}]^+$ , 258.1125. Found:  $m/z$ , 258.1124.

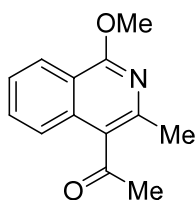

**1-(1-Methoxy-3-methylisoquinolin-4-yl)ethan-1-one (4x):** The title compound was obtained as a white solid in 87% yield.  $^1\text{H}$  NMR (400 MHz,  $\text{CDCl}_3$ )  $\delta$  8.23 (d,  $J = 8.3$  Hz, 1H), 7.64 (ddd,  $J = 8.2, 6.9, 1.2$  Hz, 1H), 7.56 (d,  $J = 8.3$  Hz, 1H), 7.51 – 7.46 (m, 1H), 4.13 (s, 3H), 2.62 (s, 3H), 2.52 (s, 3H).  $^{13}\text{C}$  NMR (101 MHz,  $\text{CDCl}_3$ )  $\delta$  206.31, 160.23, 144.55, 134.71, 131.16, 126.10, 125.99, 124.45, 122.91, 117.58, 53.83, 32.97, 22.53. HRMS (ESI) Calcd. For  $\text{C}_{13}\text{H}_{14}\text{NO}_2$ :  $[\text{M}+\text{H}]^+$ , 216.1019. Found:  $m/z$ , 216.1018.

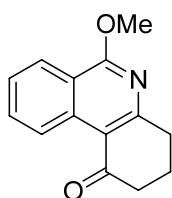

**6-Methoxy-3,4-dihydrophenanthridin-1(2H)-one (4y):** The title compound was obtained as a white solid in 80% yield.  $^1\text{H}$  NMR (400 MHz,  $\text{CDCl}_3$ )  $\delta$  9.38 (d,  $J = 8.7$  Hz, 1H), 8.24 (d,  $J = 8.2$  Hz, 1H), 7.76 (ddd,  $J = 8.5, 7.0, 1.4$  Hz, 1H), 7.54 – 7.49 (m, 1H), 4.18 (s, 3H), 3.15 (t,  $J = 6.2$  Hz, 2H), 2.75 – 2.71 (m, 2H), 2.21 – 2.14 (m, 2H).  $^{13}\text{C}$  NMR (101 MHz,  $\text{CDCl}_3$ )  $\delta$  199.64, 162.64, 161.86, 136.10, 132.50, 126.33, 125.95, 124.05, 118.61, 116.72, 54.19, 40.39, 34.01, 21.86. HRMS (ESI) Calcd. For  $\text{C}_{14}\text{H}_{14}\text{NO}_2$ :  $[\text{M}+\text{H}]^+$ , 228.1019. Found:  $m/z$ , 228.1017.

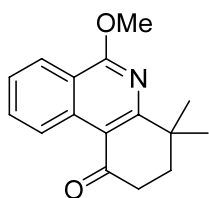

**6-Methoxy-4,4-dimethyl-3,4-dihydrophenanthridin-1(2H)-one (4z):** The title compound was obtained as a white solid in 75% yield.  $^1\text{H}$  NMR (400 MHz,  $\text{CDCl}_3$ )  $\delta$  9.39 (d,  $J = 8.6$  Hz, 1H), 8.24 (d,  $J = 8.2$  Hz, 1H), 7.80 – 7.73 (m, 1H), 7.51 (t,  $J = 7.5$  Hz, 1H), 4.18 (s, 3H), 3.05 (s, 2H), 2.59 (s, 2H), 1.15 (s, 6H).  $^{13}\text{C}$  NMR (101 MHz,  $\text{CDCl}_3$ )  $\delta$  199.83, 163.08, 160.22, 135.90, 132.57, 126.37, 125.81, 124.10, 118.59, 115.75, 54.20, 54.06, 47.90, 32.63, 28.21. HRMS (ESI) Calcd. For  $\text{C}_{16}\text{H}_{18}\text{NO}_2$ :  $[\text{M}+\text{H}]^+$ , 256.1332. Found:  $m/z$ , 256.1330.

## 7. References

- (S1) V. K. Yadav and K. G. Babu, *Eur. J. Org. Chem.* **2005**, 2, 452-456.
- (S2) P. R. Golubev, A. S. Pankova and M. A. Kuznetsov, *Eur. J. Org. Chem.* **2014**, 17, 3614-3617.
- (S3) M. O. Erhunmwunse and P. G. Steel, *J. Org. Chem.* **2008**, 73, 8675-8677.
- (S4) P. Cheng, J.-J. Cheng and J.-B. Wang, *J. Am. Chem. Soc.* **2007**, 129, 8708-8709.
- (S5) M. K. Muthyala, S. Choudhary and A. Kumar, *J. Org. Chem.* **2012**, 77, 8787-8791.
- (S6) M. Presset, D. Mailhol, Y. Coquerel and J. Rodriguez, *Synth.* **2011**, 16, 2549-2552.
- (S7) Z.-Z. Shi, D. C. Koester, M. Boultadakis-Arapinis, and F. Glorius, *J. Am. Chem. Soc.* **2013**, 135, 12204-12207.
